# Supplementary material for: Abnormal Cortical and Trabecular Bone in Youth With Type 1 Diabetes and Celiac Disease
Source: Oxford University Press journal article supplement (doi:10.2337/dc18-2376), 2019-06-04
Supplement: dc182376supplementarydata.pdf [file dc182376supplementarydata.pdf]

SUPPLEMENTARY DATA

**Supplementary Table S1.** Tibial pQCT results stratified by absence or presence of CD

|                                | <b>T1DM + CD<br/>(n=39)<br/>z-score ± SD</b> | <b>T1DM (n=39)<br/>z-score ± SD</b> | <b>p-value</b> |
|--------------------------------|----------------------------------------------|-------------------------------------|----------------|
| Cort BMC/Muscle CSA z-score    | -0.07 ± 0.98                                 | 0.27 ± 1.04                         | 0.14           |
| CSA Muscle z-score             | -0.23 ± 1.08                                 | -0.42 ± 1.16                        | 0.46           |
| 4% vBMD Trabecular z-score     | -0.62 ± 0.67                                 | -0.57 ± 0.76                        | 0.76           |
| 66% BMC Cortical z-score       | -0.39 ± 1.07                                 | -0.16 ± 1.77                        | 0.48           |
| 66% Cortical Thickness z-score | -0.60 ± 0.6                                  | -0.58 ± 0.92                        | 0.92           |
| 66% CSA Cortical z-score       | -0.54 ± 1.08                                 | -0.35 ± 1.70                        | 0.55           |
| 66% CSA Total Bone z-score     | 0.29 ± 1.53                                  | 0.79 ± 1.78                         | 0.19           |
| 66% pSSI z-score               | 0.82 ± 1.90                                  | 1.48 ± 2.53                         | 0.2            |
| 66% vBMD Cortical z-score      | 0.39 ± 0.59                                  | 0.48 ± 0.62                         | 0.50           |
